# Supplementary material for: Evaluation of an Epitypified Ophiocordyceps formosana (Cordyceps s.l.) for Its Pharmacological Potential
Source: PubMed Central journal article supplement (PMC4587430; doi:10.1155/2015/189891), 2015-09-15
Supplement: 189891.f1.pdf [file 189891.f1.pdf]

### Supporting table 1

Primer sequences used for the molecular identifications in this study

| Target gene                    | Name of primers | Primer sequences        | Reference |
|--------------------------------|-----------------|-------------------------|-----------|
| <i>RPB1</i>                    | cRPB1           | CCWGGYTTYATCAAGAARGT    | [25]      |
|                                | RPB1cr          | CCNGCDATNTCRTRTCCATRТА  | [25]      |
| <i>RPB2</i>                    | fRPB2-5f        | GAYGAYMGWGATCAYTTYGG    | [26]      |
|                                | fRPB2-7cr       | CCCATRGCTTGYTTRCCCAT    | [26]      |
| <i>EF1-<math>\alpha</math></i> | EF1-2218R       | ATGACACCRACRGCACRGTYTG  | [27]      |
|                                | EF1-983F        | GCYCCYGGHCAYCGTGAYTTYAT | [27]      |

## Supporting table 2

Comparisons of the homologous strains of *O. formosana* via BLAST of the NCBI GenBank database based on the *RPB1*, *RPB2*, and *EF1- $\alpha$*  genes.

| <b>Genetic markers</b>         | <b>Closest species and strains matched</b> | <b>Nucleotide identity</b> | <b>Accession number</b> |
|--------------------------------|--------------------------------------------|----------------------------|-------------------------|
| <i>RPB1</i>                    | <i>Cordyceps formosana</i> TNM F13893      | 99%(635/635)               | KJ878988.1              |
| <i>RPB2</i>                    | <i>Cordyceps formosana</i> TNM F13893      | 100% (544/544)             | KJ878943.1              |
| <i>EF1-<math>\alpha</math></i> | <i>Cordyceps formosana</i> TNM F13893      | 99%(847/849)               | KJ878956.1              |

### Supporting table 3

Nucleotide sequences used in phylogenetic analysis and their accession numbers.

| Species names                                | Accession numbers of genes |             |                                |
|----------------------------------------------|----------------------------|-------------|--------------------------------|
|                                              | <i>RPB1</i>                | <i>RPB2</i> | <i>EF1-<math>\alpha</math></i> |
| <i>Ophiocordyceps irangiensis</i> OSC 128579 | EF469089                   | EF469107    | EF469060                       |
| <i>Ophiocordyceps rhizoidea</i> NHJ 12529    | EF468872                   | EF468922    | EF468765                       |
| <i>Ophiocordyceps rhizoidea</i> NHJ 12522    | EF468873                   | EF468923    | EF468764                       |
| <i>Ophiocordyceps sinensis</i> EFCC 7287     | EF468874                   | EF468924    | EF468767                       |
| <i>Cordyceps stylophora</i> OSC 110999       | EF468882                   | EF468931    | EF468777                       |
| <i>Ophiocordyceps entomorrhiza</i> KEW 53484 | EF468857                   | EF468911    | EF468749                       |
| <i>Elaphocordyceps subsessilis</i> OSC 71235 | EF469090                   | EF469108    | EF469061                       |
| <i>Ophiocordyceps gracilis</i> EFCC 8572     | EF468859                   | EF468912    | EF468751                       |
| <i>Ophiocordyceps gracilis</i> EFCC 3101     | EF468858                   | EF468913    | EF468750                       |
| <i>Ophiocordyceps heteropoda</i> EFCC 10125  | EF468860                   | EF468914    | EF468752                       |
| <i>Ophiocordyceps formosana</i> TNM F13893   | KJ878988                   | KJ878943    | KJ878956                       |
| <i>Ophiocordyceps formosana</i> MUCHO 815    | KR052521                   | KR052522    | KR052523                       |
| <i>Ophiocordyceps formosana</i> NTU 00035    | KT275190                   | KT275191    | KT275192                       |
| <i>Ophiocordyceps konnoana</i> EFCC 7315     | EF468861                   | EF468916    | EF468753                       |
| <i>Cordyceps ravenelii</i> OSC 110995        | DQ522379                   | DQ522430    | DQ522334                       |
| <i>Ophiocordyceps nigrella</i> EFCC 9247     | EF468866                   | EF468920    | EF468758                       |
| <i>Ophiocordyceps variabilis</i> OSC 111003  | EF468885                   | EF468933    | EF468779                       |
| <i>Cordyceps s. variabilis</i> ARSEF 5365    | DQ522386                   | DQ522437    | DQ522340                       |
| <i>Haptocillium zeosporum</i> CBS 335.80     | EF469091                   | EF469109    | EF469062                       |
| <i>Paecilomyces lilacinus</i> CBS 431.87     | EF468897                   | EF468940    | EF468791                       |
| <i>Paecilomyces lilacinus</i> CBS 284.36     | EF468898                   | EF468941    | EF468792                       |
| <i>Nectria</i> sp. CBS 478.75                | EF469097                   | EF469115    | EF469068                       |
| <i>Torrubiella luteorostrata</i> NHJ 12516   | EF468905                   | EF468946    | EF468800                       |
| <i>Aschersonia placenta</i> BCC 7869         | EF469085                   | EF469104    | EF469056                       |
| <i>Shimizuomyces paradoxus</i> EFCC 6279     | EF469100                   | EF469117    | EF469071                       |
| <i>Shimizuomyces paradoxus</i> EFCC 6564     | EF469101                   | EF469118    | EF469072                       |
| <i>Claviceps purpurea</i> SA cp11            | EF469087                   | EF469105    | EF469058                       |
| <i>Balansia epichloe</i> AEG 96-1 5a         | EF468851                   | EF468908    | EF468743                       |
| <i>Pochonia bulbillosa</i> CBS 145.70        | EF468902                   | EF468943    | EF468796                       |
| <i>Tolyposcladium parasiticum</i> ARSEF 3436 | EF468904                   | EF468945    | EF468799                       |
| <i>Pochonia rubescens</i> CBS 464.88         | EF468903                   | EF468944    | EF468797                       |
| <i>Pochonia chlamydosporia</i> CBS 504.66    | EF469098                   | EF469120    | EF469069                       |
| <i>Nomuraea rileyi</i> CBS 806.71            | EF468893                   | EF468937    | EF468787                       |
| <i>Paecilomyces carneus</i> CBS 239.32       | EF468894                   | EF468938    | EF468789                       |

|                                              |          |          |          |
|----------------------------------------------|----------|----------|----------|
| <i>Paecilomyces carneus</i> CBS 399.59       | EF468895 | EF468939 | EF468788 |
| <i>Paecilomyces marquandii</i> CBS 182.27    | EF468899 | EF468942 | EF468793 |
| <i>Cordyceps</i> sp. OSC 110996              | EF468880 | EF468928 | EF468773 |
| <i>Cordyceps</i> sp. NHJ 12118               | EF468878 | EF468927 | EF468768 |
| <i>Torrubiella wallacei</i> CBS 101237       | EF469102 | EF469119 | EF469073 |
| <i>Cordyceps cardinalis</i> OSC 93610        | EF469088 | EF469106 | EF469059 |
| <i>Lecanicillium attenuatum</i> CBS 402.78   | EF468888 | EF468935 | EF468782 |
|                                              | Whole    | Whole    | Whole    |
| <i>Cordyceps militaris</i> CM01              | genome   | genome   | genome   |
|                                              | blast    | blast    | blast    |
| <i>Cordyceps kysuyuensis</i> EFCC 5886       | EF468863 | EF468917 | EF468754 |
| <i>Microhilum oncoperae</i> AFSEF 4358       | EF468891 | EF468936 | EF468785 |
| <i>Cordyceps takaomontana</i> NHJ 12623      | EF468884 | EF468932 | EF468778 |
| <i>Cordyceps ochraceostromata</i> ARSEF 5691 | EF468867 | EF468921 | EF468759 |
| <i>Cordyceps bifusispora</i> EFCC 8260       | EF468855 | EF468910 | EF468747 |
| <i>Cordyceps bifusispora</i> EFCC 5690       | EF468854 | EF468909 | EF468746 |
| <i>Lecanicillium psalliotae</i> CBS 532.81   | EF469096 | EF469112 | EF469067 |
| <i>Lecanicillium psalliotae</i> CBS 101270   | EF469095 | EF469113 | EF469066 |
| <i>Torrubiella alba</i> CBS 726.73a          | EF468887 | EF468934 | EF468781 |
| <i>Roumegueriella rufula</i> GJS 91-164      | EF469099 | EF469116 | EF469070 |

---

## Supporting text 1

### Descriptions of *Ophiocordyceps formosana*

#### *Combinatio nova:*

*Ophiocordyceps formosana* (Kobayasi & Shimizu) Wang, Tsai, Tzean & Shen *comb. nov.*

Mycobank: MB811035

≡ *Cordyceps formosana* Kobayasi & Shimizu, Bull. Natn. Sci. Mus.: 113 (1981)

Ascostroma arises from the head or abdomen of an insect host (darkling beetle larva, Tenebrionoidea). Stroma stalk is long-cylindrical, 10-30 mm × 0.5-2 mm, orange (6A7) in color, with short hairs, without membranous sheath. Stroma head is oblong, 4-6 mm × 1-4 mm, consists of epidermal pseudoparenchymatous tissue. Perithecia are embedded, ovoid in shape, brownish orange (7C8) in color, 360-480 × 240-320 μm, with ostioles 60 μm in width, perithecial wall 20 μm in thickness, covered with 40-μm-thick epidermal tissue; ascus is long-cylindrical, with attenuated base, 6.5-7.9 μm × 160-240 μm, apex is thick dome-shaped, with narrow slit, 3.9-5.3 × 3.2-4.6 μm; ascospores are 8 in number, hyaline, cylindrical and filamentous, usually fragmenting into many partspores, showing cylindrical and truncated, 2.6-3.0 × 6.5-7.3 μm. Colonies on potato dextrose agar (PDA) appear orange (5A7) to white, pulvinate to umbonate, mycelium white, velutinous to floccose, exudating orange to pink droplets.

Anamorphic state: the *Hirsutella*-type. The conidiogenous cell exhibits a monophialidic, hyaline, elongated-ampuliform, 1.5-2.3 × 8.6-17.0 μm. Conidia hyaline is cylindrical, 1.6-2.3 × 3.6-6.9 μm.

**Habitats:** growing on a darkling beetle larva (Tenebrionoidea) on fallen decayed logs.

**Known distribution:** Lalashan, Taoyuan county, Taiwan. Fonghuangshan, Nanto county, Taiwan. Guanwu, Hsinchu county, Taiwan. Huangshan, Anhui Providence, China.

**Specimen examined:** MUCHO 815, Collected and examined on August 15, 2013, from Lalashan, Taoyuan county, Taiwan, GPS altitude: 1600 m, latitude: 24° 42' 1.20" N, longitude: 121° 25' 49.20" E. collector, Y.-W. Wang, S.-H. Tsai, T.-W. Hong, J.-Y. Lai, T.-L. Shen.
